# Supplementary material for: Living with Multimorbidity through Time: A Meta-Synthesis of Qualitative Longitudinal Evidence
Source: MDPI journal article supplement (doi:10.3390/healthcare12040446), 2024-02-09
Supplement: s1 [file s1]

PRISMA 2020 flow diagram for new systematic reviews which included searches of databases, registers and other sources

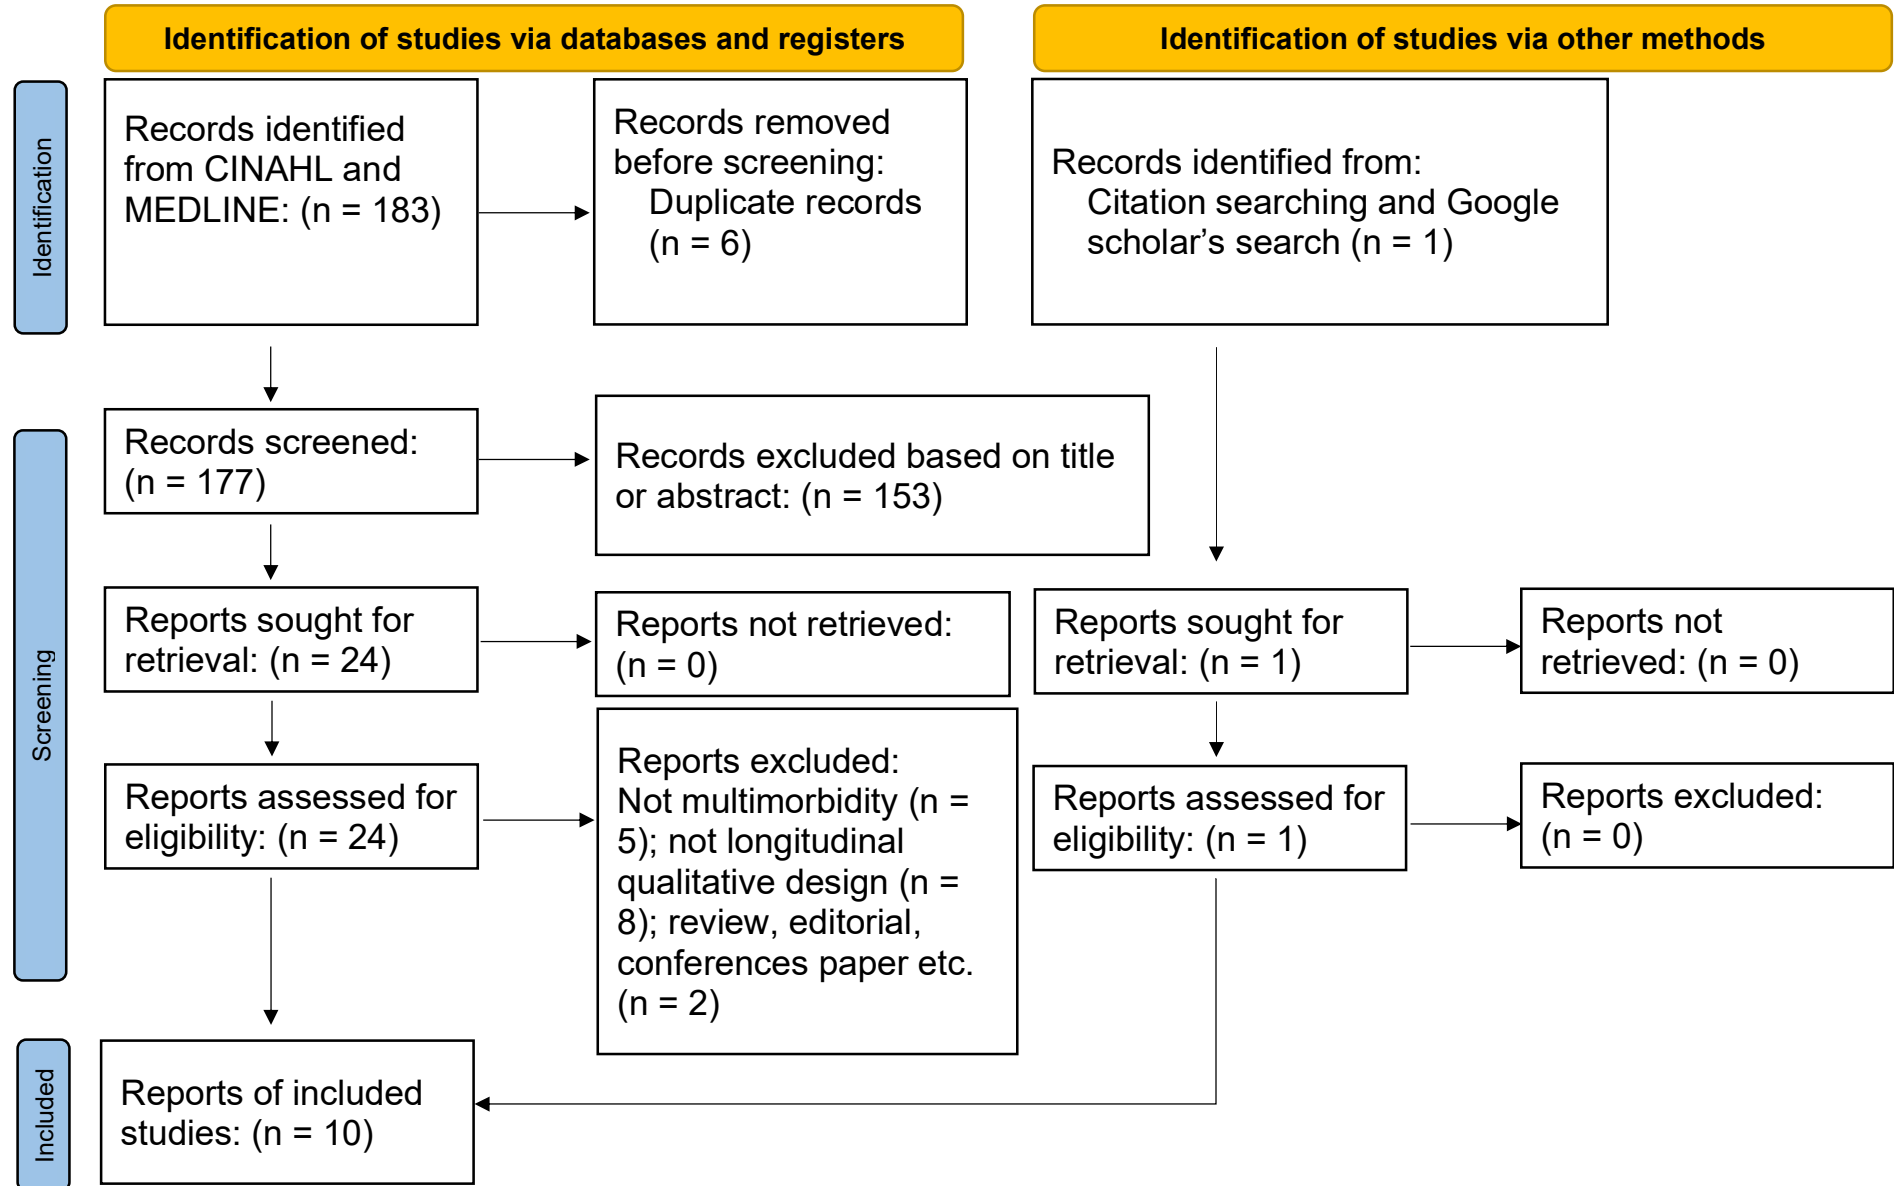

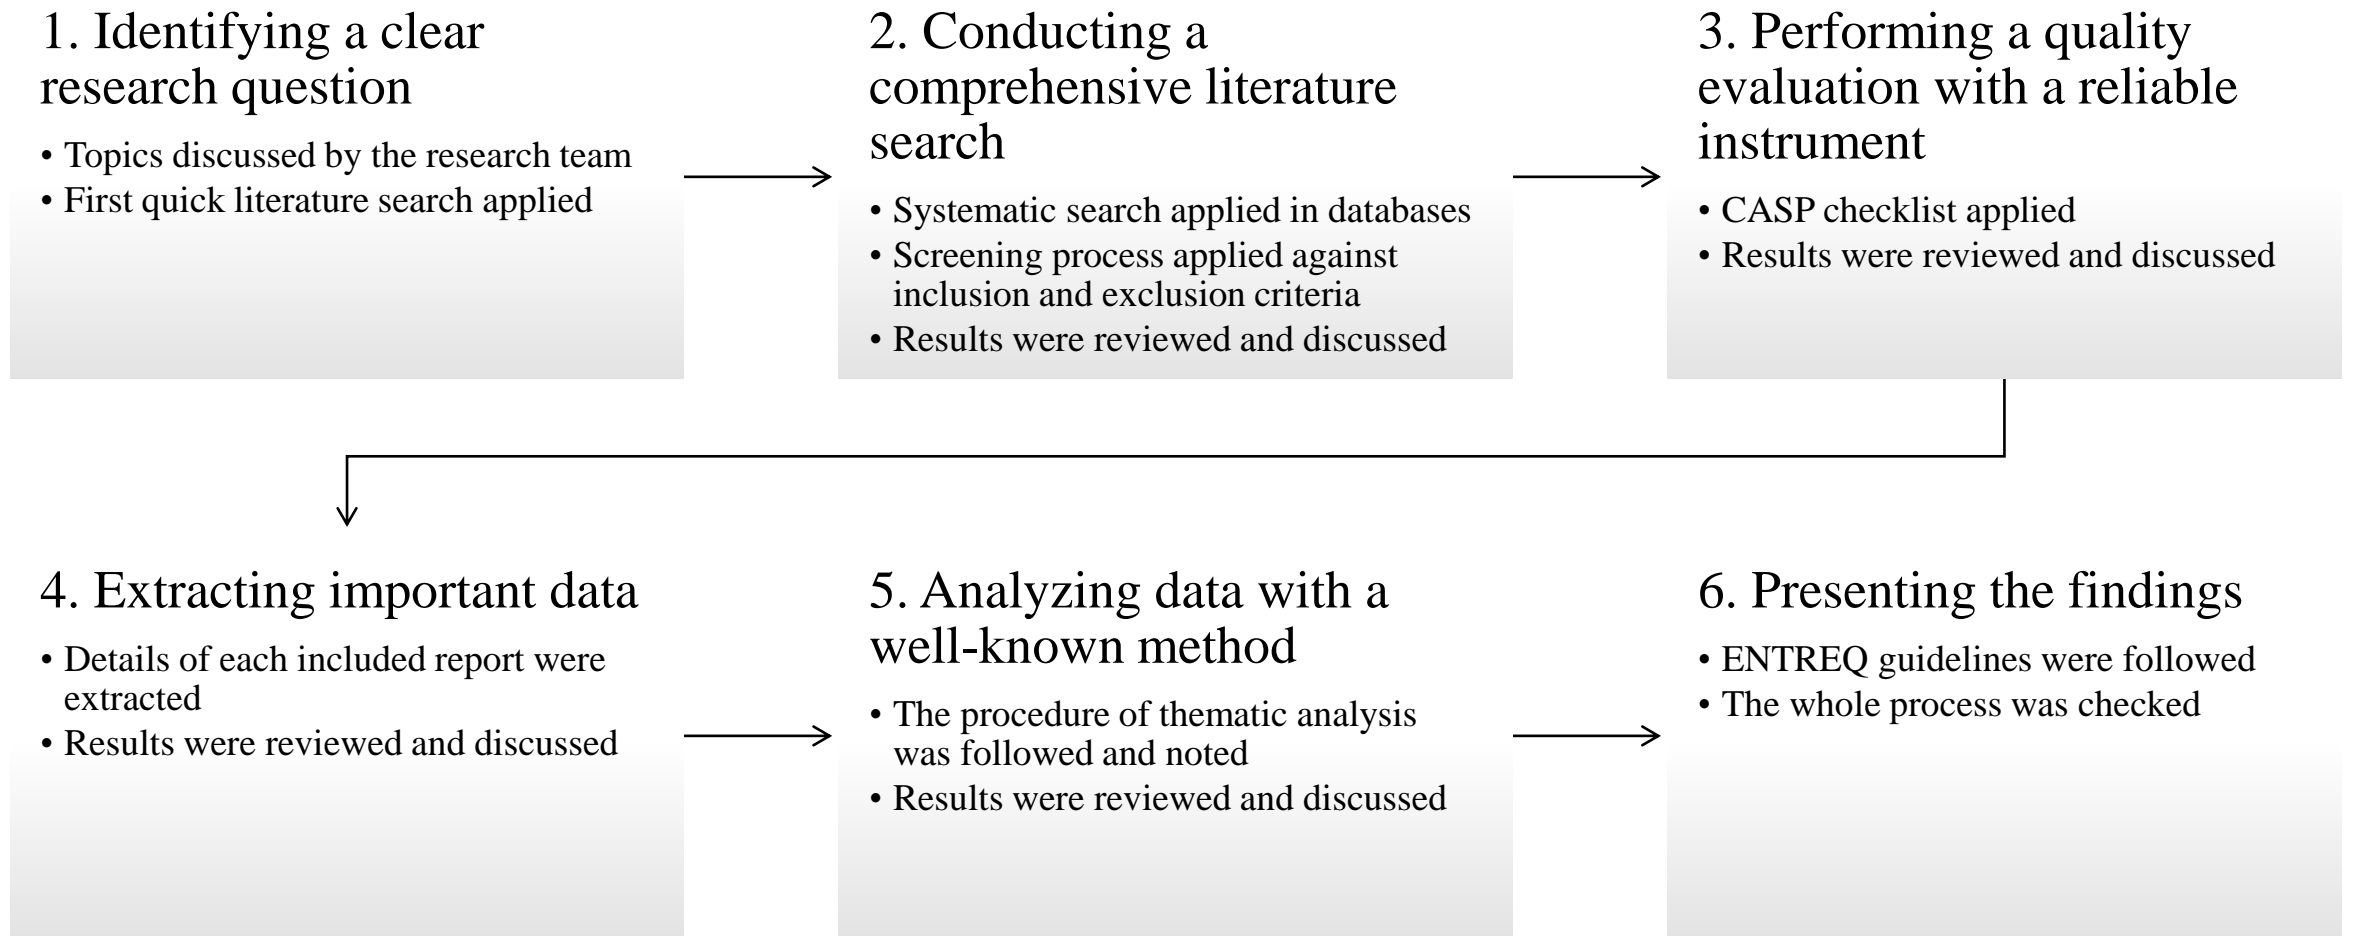

Figure S1. Meta-synthesis procedure

# Living experiences with multimorbidity through time

## A plain summary

Participants discussed the physical and psychological impacts of multimorbidity, their daily self-management, and the encounter with healthcare providers, emphasizing the importance of family support.

## Perceiving multimorbidity

Identity and illness

Impact of chronic illness

Prioritization of health problems

Medication burden

Aging and health

## Managing chronic conditions

Adaptation and resilience to illness

Self-sufficiency and autonomy

Goal setting and determination

## Emotional struggles in everyday life with multimorbidity

Despair and hopelessness

Frustration and stress

Grief and loss

Self-blame

Lack of energy and motivation

Fear and uncertainty

## Interactions with the healthcare system and healthcare professionals

Trust and honesty

Personalized care

Confidence in treatment

Continuity of care

Empathy and understanding

Health communication

Healthcare system

## Family Support

Family involvement and support

Economic stability

Advance care planning

Figure S2. Coding tree for thematic analysis

Note: Illustrative quotations are presented in the text.
